# Supplementary material for: Comparative Study of T-Cell Repertoires after COVID-19 Immunization with Homologous or Heterologous Vaccine Booster
Source: MDPI journal article supplement (doi:10.3390/pathogens13040284), 2024-03-27
Supplement: s1 [file s1]

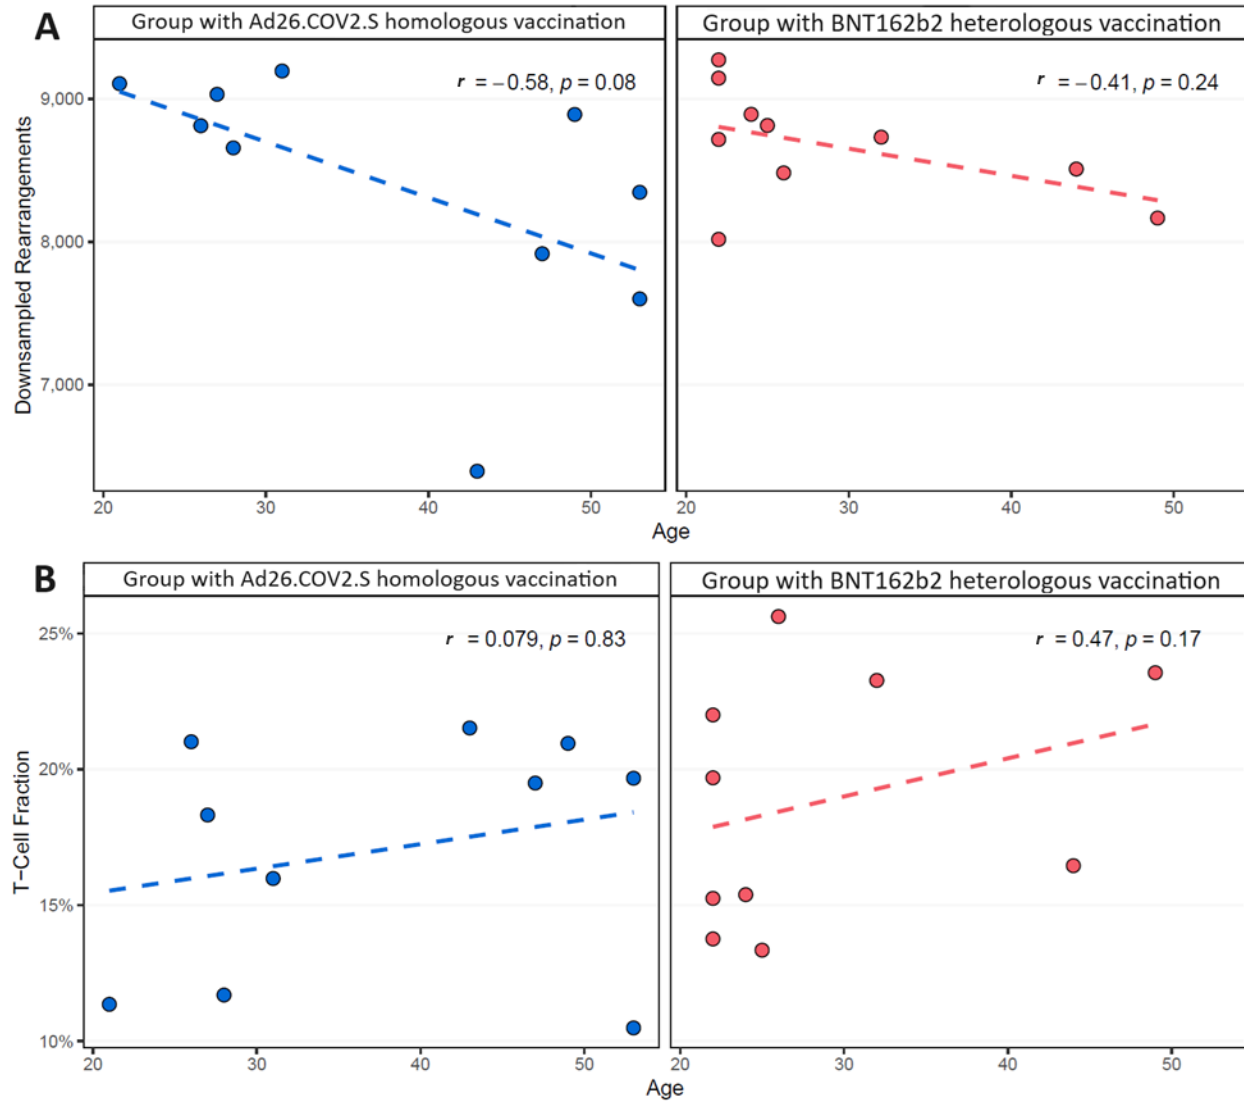

**Figure S1.** Spearman correlation of Downsampled Rearrangements (A) and T-Cell Fraction (B) metrics of TCR $\beta$  rearrangements with age of group with Ad26.COVS2.S homologous vaccination (left, blue colour) and of group with Ad26.COVS2.S - BNT162b2 heterologous vaccination (right, red colour). Significant  $p$ -value was  $<0.05$ .

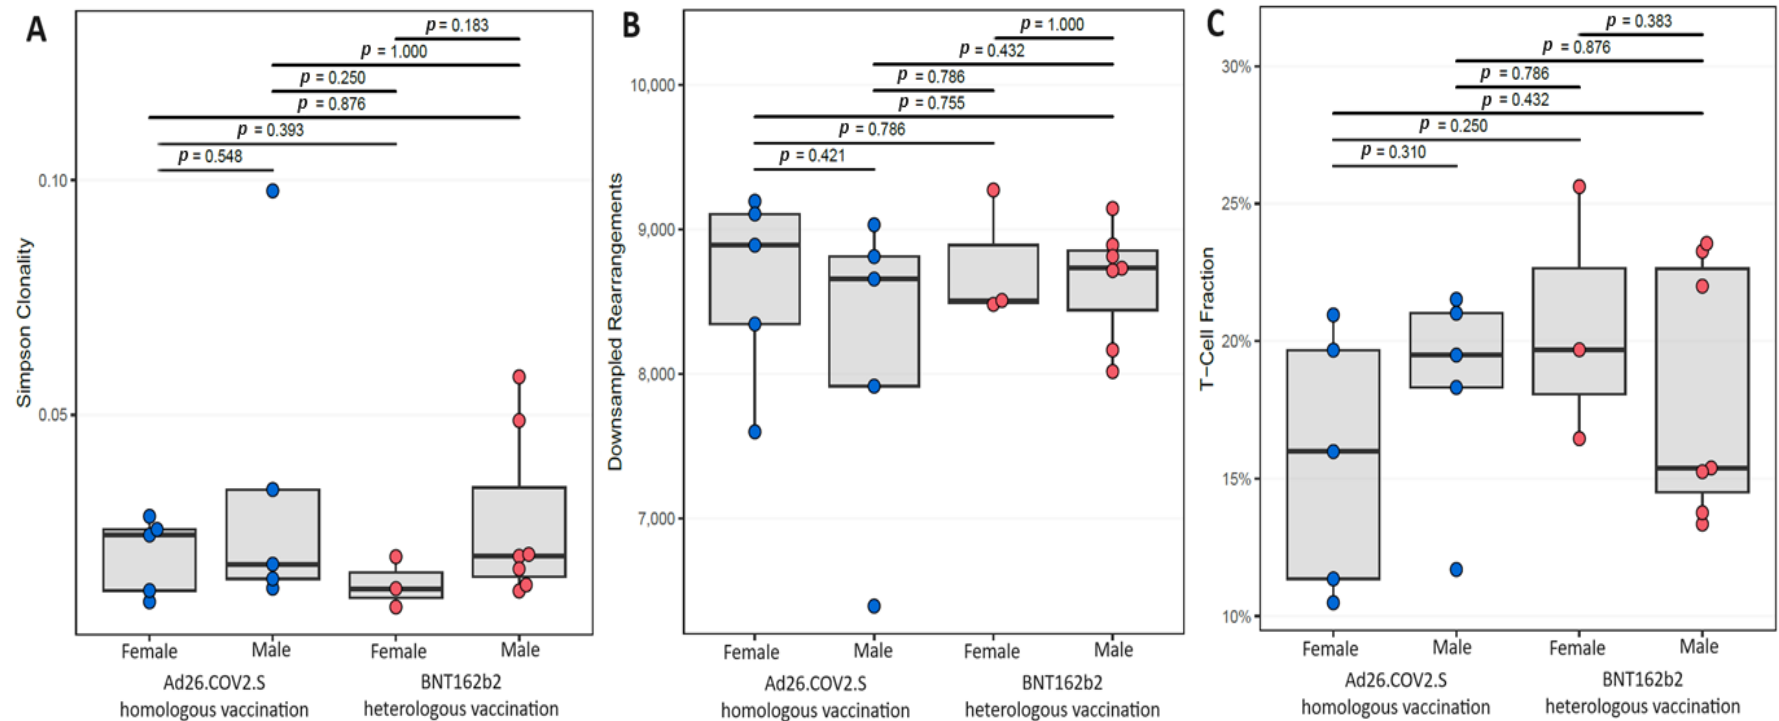

**Figure S2.** Box plot of T-cell receptor beta metrics reflecting the immune competency (A. Simpson Clonality, B. Downsampled rearrangements and C. T-cell fraction) with sex of Ad26.COV2.S homologous vaccination (blue colour) and BNT162b2 heterologous vaccination (red colour) groups. Significant  $p$ -value was  $<0.05$  using Mann–Whitney test.
